# Supplementary material
Source: ML conference proceedings conference paper supplement (https://proceedings.mlr.press/v80/sinha18a.html)
Supplement: Supplementary file [file sinha18a-supp.pdf]

---

# Supplementary material for k-means clustering using random matrix sparsification

---

Kaushik Sinha <sup>1</sup>

## 1. Proof of auxiliary lemmas

### 1.1. Proof of Lemma 1

*Proof.* Let  $\tilde{\mathbf{A}}_{r-m} = \tilde{\mathbf{A}} - \tilde{\mathbf{A}}_m$  (we have assumed that rank of  $\tilde{\mathbf{A}}$  is  $r$  and  $r > m$ ). First note that  $\tilde{\mathbf{A}}_m$  and  $\tilde{\mathbf{A}}_{r-m}$  are orthogonal to each other. To see this write  $\tilde{\mathbf{A}}$  using singular value decomposition as  $\tilde{\mathbf{A}} = \sum_{i=1}^r \sigma_i(\tilde{\mathbf{A}}) \tilde{\mathbf{u}}_i \tilde{\mathbf{v}}_i^\top$ , where  $\tilde{\mathbf{u}}_i$  and  $\tilde{\mathbf{v}}_i$  are left and right singular vectors of  $\tilde{\mathbf{A}}$  respectively, and  $\sigma_1(\tilde{\mathbf{A}}) \geq \sigma_2(\tilde{\mathbf{A}}) \geq \dots \geq \sigma_r(\tilde{\mathbf{A}})$  are singular values of  $\tilde{\mathbf{A}}$ . Clearly,  $\tilde{\mathbf{A}}_m = \sum_{i=1}^m \sigma_i(\tilde{\mathbf{A}}) \tilde{\mathbf{u}}_i \tilde{\mathbf{v}}_i^\top$  and  $\tilde{\mathbf{A}}_{r-m} = \sum_{i=m+1}^r \sigma_i(\tilde{\mathbf{A}}) \tilde{\mathbf{u}}_i \tilde{\mathbf{v}}_i^\top$ . Therefore,  $\tilde{\mathbf{A}}_m \tilde{\mathbf{A}}_{r-m}^\top = \sum_{i=1}^m \sum_{j=m+1}^r \sigma_i(\tilde{\mathbf{A}}) \sigma_j(\tilde{\mathbf{A}}) \tilde{\mathbf{u}}_i (\tilde{\mathbf{v}}_j^\top \tilde{\mathbf{v}}_i) \tilde{\mathbf{u}}_j^\top = \mathbf{0}$ . Similarly,  $\tilde{\mathbf{A}}_{r-m} \tilde{\mathbf{A}}_m^\top = \mathbf{0}$ .

Due to orthogonality of  $\tilde{\mathbf{A}}_m$  and  $\tilde{\mathbf{A}}_{r-m}$ , using Pythagorean theorem, it holds that  $\|\tilde{\mathbf{A}} - \mathbf{P}\tilde{\mathbf{A}}\|_F^2 = \|(\mathbf{I} - \mathbf{P})\tilde{\mathbf{A}}\|_F^2 = \|(\mathbf{I} - \mathbf{P})\tilde{\mathbf{A}}_m\|_F^2 + \|(\mathbf{I} - \mathbf{P})\tilde{\mathbf{A}}_{r-m}\|_F^2$  for any rank  $k$  projection matrix  $\mathbf{P}$ . To see this, let  $\mathbf{Y} = \mathbf{I} - \mathbf{P}$ . Then,

$$\begin{aligned}
& \|\tilde{\mathbf{A}} - \mathbf{P}\tilde{\mathbf{A}}\|_F^2 \\
&= \|(\mathbf{I} - \mathbf{P})\tilde{\mathbf{A}}\|_F^2 = \|\mathbf{Y}\tilde{\mathbf{A}}\|_F^2 = \|\mathbf{Y}(\tilde{\mathbf{A}}_m + \tilde{\mathbf{A}}_{r-m})\|_F^2 \\
&\stackrel{a}{=} \text{trace} \left( \mathbf{Y}(\tilde{\mathbf{A}}_m + \tilde{\mathbf{A}}_{r-m}) \left( \mathbf{Y}(\tilde{\mathbf{A}}_m + \tilde{\mathbf{A}}_{r-m}) \right)^\top \right) \\
&= \text{trace} \left( \mathbf{Y}(\tilde{\mathbf{A}}_m + \tilde{\mathbf{A}}_{r-m}) (\tilde{\mathbf{A}}_m + \tilde{\mathbf{A}}_{r-m})^\top \mathbf{Y}^\top \right) \\
&= \text{trace} \left( \mathbf{Y}\tilde{\mathbf{A}}_m \tilde{\mathbf{A}}_m^\top \mathbf{Y}^\top + \mathbf{Y}\tilde{\mathbf{A}}_{r-m} \tilde{\mathbf{A}}_{r-m}^\top \mathbf{Y}^\top + \right. \\
&\quad \left. \mathbf{Y}\tilde{\mathbf{A}}_m \tilde{\mathbf{A}}_{r-m}^\top \mathbf{Y}^\top + \mathbf{Y}\tilde{\mathbf{A}}_{r-m} \tilde{\mathbf{A}}_m^\top \mathbf{Y}^\top \right) \\
&\stackrel{b}{=} \text{trace} \left( \mathbf{Y}\tilde{\mathbf{A}}_m \tilde{\mathbf{A}}_m^\top \mathbf{Y}^\top \right) + \text{trace} \left( \mathbf{Y}\tilde{\mathbf{A}}_{r-m} \tilde{\mathbf{A}}_{r-m}^\top \mathbf{Y}^\top \right) \\
&= \|\mathbf{Y}\tilde{\mathbf{A}}_m\|_F^2 + \|\mathbf{Y}\tilde{\mathbf{A}}_{r-m}\|_F^2 \\
&= \|(\mathbf{I} - \mathbf{P})\tilde{\mathbf{A}}_m\|_F^2 + \|(\mathbf{I} - \mathbf{P})\tilde{\mathbf{A}}_{r-m}\|_F^2
\end{aligned}$$

where, equality *a* follows from the fact that for any matrix  $\mathbf{B}$ ,  $\|\mathbf{B}\|_F^2 = \text{trace}(\mathbf{B}\mathbf{B}^\top)$  and equality *b* follows from linearity of trace and orthogonality of  $\tilde{\mathbf{A}}_m$  and  $\tilde{\mathbf{A}}_{r-m}$ .

---

<sup>1</sup>Department of Electrical Engineering & Computer Science, Wichita State University, KS, USA. Correspondence to: Kaushik Sinha <kaushik.sinha@wichita.edu>.

Since any rank  $k$  projection matrix  $\mathbf{P}$  can be written as  $\mathbf{P} = \mathbf{Q}\mathbf{Q}^\top$ , where  $\mathbf{Q}$  is a matrix of  $k$  orthonormal columns,  $\mathbf{P}\tilde{\mathbf{A}}$  is a rank  $k$  matrix spanned by the columns of  $\mathbf{Q}$ . Clearly,  $(\tilde{\mathbf{A}} - \mathbf{P}\tilde{\mathbf{A}})$  is spanned by  $(r - k)$  orthonormal columns (which are orthogonal to the columns of  $\mathbf{Q}$  since  $\tilde{\mathbf{A}}$  has rank  $r$ ). Therefore,  $\mathbf{P}\tilde{\mathbf{A}}$  and  $(\tilde{\mathbf{A}} - \mathbf{P}\tilde{\mathbf{A}})$  are orthogonal to each other and using similar argument as above we see that,  $\|\tilde{\mathbf{A}}\|_F^2 = \|\mathbf{P}\tilde{\mathbf{A}} + (\tilde{\mathbf{A}} - \mathbf{P}\tilde{\mathbf{A}})\|_F^2 = \text{trace} \left( (\mathbf{P}\tilde{\mathbf{A}} + (\tilde{\mathbf{A}} - \mathbf{P}\tilde{\mathbf{A}})) (\mathbf{P}\tilde{\mathbf{A}} + (\tilde{\mathbf{A}} - \mathbf{P}\tilde{\mathbf{A}}))^\top \right) = \text{trace} \left( \mathbf{P}\tilde{\mathbf{A}} (\mathbf{P}\tilde{\mathbf{A}})^\top \right) + \text{trace} \left( (\tilde{\mathbf{A}} - \mathbf{P}\tilde{\mathbf{A}}) (\tilde{\mathbf{A}} - \mathbf{P}\tilde{\mathbf{A}})^\top \right) = \|\mathbf{P}\tilde{\mathbf{A}}\|_F^2 + \|\tilde{\mathbf{A}} - \mathbf{P}\tilde{\mathbf{A}}\|_F^2$ . In other words,  $\|\tilde{\mathbf{A}} - \mathbf{P}\tilde{\mathbf{A}}\|_F^2 = \|\tilde{\mathbf{A}}\|_F^2 - \|\mathbf{P}\tilde{\mathbf{A}}\|_F^2$ .

Now using optimality of  $\tilde{\mathbf{P}}^*$  and definition of  $\hat{\mathbf{P}}$ , we get,  $\|(\mathbf{I} - \hat{\mathbf{P}})\tilde{\mathbf{A}}\|_F^2 \leq \gamma \|(\mathbf{I} - \tilde{\mathbf{P}}^*)\tilde{\mathbf{A}}\|_F^2 \leq \gamma \|(\mathbf{I} - \tilde{\mathbf{P}}_m^*)\tilde{\mathbf{A}}\|_F^2$ . Expanding on both side, we get,

$$\begin{aligned}
& \|(\mathbf{I} - \hat{\mathbf{P}})\tilde{\mathbf{A}}_m\|_F^2 + \|(\mathbf{I} - \hat{\mathbf{P}})\tilde{\mathbf{A}}_{r-m}\|_F^2 \\
&\leq \gamma \left( \|(\mathbf{I} - \tilde{\mathbf{P}}_m^*)\tilde{\mathbf{A}}_m\|_F^2 + \|(\mathbf{I} - \tilde{\mathbf{P}}_m^*)\tilde{\mathbf{A}}_{r-m}\|_F^2 \right)
\end{aligned}$$

Rearranging the terms,

$$\begin{aligned}
& \|(\mathbf{I} - \hat{\mathbf{P}})\tilde{\mathbf{A}}_m\|_F^2 \\
&\leq \gamma \|(\mathbf{I} - \tilde{\mathbf{P}}_m^*)\tilde{\mathbf{A}}_m\|_F^2 + \gamma \|(\mathbf{I} - \tilde{\mathbf{P}}_m^*)\tilde{\mathbf{A}}_{r-m}\|_F^2 \\
&\quad - \|(\mathbf{I} - \hat{\mathbf{P}})\tilde{\mathbf{A}}_{r-m}\|_F^2 \\
&= \gamma \|(\mathbf{I} - \tilde{\mathbf{P}}_m^*)\tilde{\mathbf{A}}_m\|_F^2 + \gamma \|\tilde{\mathbf{A}}_{r-m}\|_F^2 - \gamma \|\tilde{\mathbf{P}}_m^* \tilde{\mathbf{A}}_{r-m}\|_F^2 \\
&\quad - \left( \|\tilde{\mathbf{A}}_{r-m}\|_F^2 - \|\hat{\mathbf{P}}\tilde{\mathbf{A}}_{r-m}\|_F^2 \right) \\
&\leq \gamma \|(\mathbf{I} - \tilde{\mathbf{P}}_m^*)\tilde{\mathbf{A}}_m\|_F^2 + (\gamma - 1) \|\tilde{\mathbf{A}}_{r-m}\|_F^2 + \|\hat{\mathbf{P}}\tilde{\mathbf{A}}_{r-m}\|_F^2 \tag{1}
\end{aligned}$$

This establishes the first result. When  $\gamma = 1$ ,  $\hat{\mathbf{P}} = \tilde{\mathbf{P}}^*$  and the above inequality becomes

$$\|(\mathbf{I} - \tilde{\mathbf{P}}^*)\tilde{\mathbf{A}}_m\|_F^2 \leq \|(\mathbf{I} - \tilde{\mathbf{P}}_m^*)\tilde{\mathbf{A}}_m\|_F^2 + \|\hat{\mathbf{P}}\tilde{\mathbf{A}}_{r-m}\|_F^2 \tag{2}$$

Next we show how to bound  $\|\hat{\mathbf{P}}\tilde{\mathbf{A}}_{r-m}\|_F^2$ . First note that,  $\|\tilde{\mathbf{A}}_{r-m}\|_F^2 = \sum_{i=1}^{r-m} \sigma_i^2(\tilde{\mathbf{A}} - \tilde{\mathbf{A}}_m) = \sum_{i=m+1}^r \sigma_i^2(\tilde{\mathbf{A}})$ . Since  $\hat{\mathbf{P}}$  is a rank  $k$  projection matrix, assuming  $r - m > k$ ,  $\hat{\mathbf{P}}\tilde{\mathbf{A}}_{r-m}$  has rank  $k$ , and therefore,  $\|\hat{\mathbf{P}}\tilde{\mathbf{A}}_{r-m}\|_F^2$  has value no more than the top  $k$  singular values of  $\tilde{\mathbf{A}}_{r-m}$ . In other

words,

$$\|\hat{\mathbf{P}}\tilde{\mathbf{A}}_{r-m}\|_F^2 \leq \sum_{i=1}^k \sigma_i^2(\tilde{\mathbf{A}} - \tilde{\mathbf{A}}_m) = \sum_{i=m+1}^{m+k} \sigma_i^2(\tilde{\mathbf{A}}) \quad (3)$$

Using singular value decomposition it is easy to see that  $\|\tilde{\mathbf{A}}_m - \tilde{\mathbf{A}}_k\|_F^2 = \sum_{i=k+1}^m \sigma_i^2(\tilde{\mathbf{A}})$ . From this we can write

$$\begin{aligned} & 2\|\tilde{\mathbf{A}}_m - \tilde{\mathbf{A}}_k\|_F^2 \\ &= \sum_{i=k+1}^m \sigma_i^2(\tilde{\mathbf{A}}) + \sum_{i=k+1}^m \sigma_i^2(\tilde{\mathbf{A}}) \stackrel{a}{\geq} \sum_{i=k+1}^m \sigma_i^2(\tilde{\mathbf{A}}) + \sum_{i=m+1}^{m+k} \sigma_i^2(\tilde{\mathbf{A}}) \\ &= \sum_{i=k+1}^{m+k} \sigma_i^2(\tilde{\mathbf{A}}) \stackrel{b}{\geq} m \left( \frac{1}{k} \sum_{i=m+1}^{m+k} \sigma_i^2(\tilde{\mathbf{A}}) \right) \stackrel{c}{\geq} \frac{1}{\epsilon} \sum_{i=m+1}^{m+k} \sigma_i^2(\tilde{\mathbf{A}}) \end{aligned} \quad (4)$$

where, inequality *a* follows from the fact that sum of  $(m-k)$  singular values of  $\tilde{\mathbf{A}}$  is being bounded from below by sum of  $k$  (smaller) singular values of  $\tilde{\mathbf{A}}$  (in the worst case if all these singular values are of same value then inequality *a* will hold if  $(m-k) \geq k$  or  $m \geq 2k$ , which will always hold as long as  $\epsilon \leq 1/2$ ). Inequality *b* follows from the fact that sum of  $m$  consecutive singular values of  $\tilde{\mathbf{A}}$  is bounded from below by  $m$  times average of the smallest  $k$  of those  $m$  singular values of  $\tilde{\mathbf{A}}$ . Finally, inequality *c* follows from our choice of  $m$ . Combining equation 3 and 4 we get,

$$\begin{aligned} \|\hat{\mathbf{P}}\tilde{\mathbf{A}}_{r-m}\|_F^2 &\leq 2\epsilon\|\tilde{\mathbf{A}}_m - \tilde{\mathbf{A}}_k\|_F^2 \leq 2\epsilon\|\tilde{\mathbf{A}}_m - \tilde{\mathbf{P}}_m^* \tilde{\mathbf{A}}_m\|_F^2 \\ &= 2\epsilon\|(\mathbf{I} - \tilde{\mathbf{P}}_m^*)\tilde{\mathbf{A}}_m\|_F^2 \end{aligned} \quad (5)$$

where, the second inequality follows from the fact that  $\tilde{\mathbf{A}}_k$  is the best rank  $k$  approximation of  $\tilde{\mathbf{A}}_m$  since  $m > k$  and  $\tilde{\mathbf{P}}_m^* \tilde{\mathbf{A}}_m$  is a rank  $k$  matrix having same size that of  $\tilde{\mathbf{A}}_m$ . Combining equation 2 and 5 yields part (i) of the Lemma.

To prove part (ii) of the lemma note that  $(\gamma-1)\|\tilde{\mathbf{A}}_{r-m}\|_F^2 = \epsilon_1 \sum_{i=m+1}^r \sigma_i^2(\tilde{\mathbf{A}}) \leq \sum_{i=m+1}^{m+k} \sigma_i^2(\tilde{\mathbf{A}}) \leq 2\epsilon\|\tilde{\mathbf{A}}_m - \tilde{\mathbf{A}}_k\|_F^2 \leq 2\epsilon\|(\mathbf{I} - \tilde{\mathbf{P}}_m^*)\tilde{\mathbf{A}}_m\|_F^2$ . Combining this with equation 1, 5 and  $\gamma = 1 + \epsilon_1$ , yields the desired result.  $\square$

## 1.2. Proof of Lemma 2

*Proof.* We observe, using Lemma 1 of (Achlioptas & Mcsherry, 2007), that

$$\|\mathbf{A} - \tilde{\mathbf{A}}_m\|_F \leq \|\mathbf{A} - \mathbf{A}_m\|_F + \|\mathbf{N}_m\|_F + 2\sqrt{\|\mathbf{N}_m\|_F \|\mathbf{A}_m\|_F} \quad (6)$$

For the choice of  $p$  and using Theorem ??, we get  $\|\mathbf{N}_m\|_F \leq \sqrt{m\epsilon_2}\|\mathbf{A}\|_F \leq m^{1/4}\sqrt{\epsilon_2}\|\mathbf{A}\|_F$ , where the second inequality follows from the restriction of  $\epsilon_2$ . Next,  $\sqrt{\|\mathbf{N}_m\|_F \|\mathbf{A}_m\|_F} \leq \sqrt{m^{1/2}\epsilon_2}\|\mathbf{A}\|_F \|\mathbf{A}_m\|_F \leq m^{1/4}\sqrt{\epsilon_2}\|\mathbf{A}\|_F$ . Plugging in these values in equation 6 we get the desired result.  $\square$

## 1.3. Proof of Lemma 3

*Proof.* Note that the choice of  $m$  satisfies,  $\|\mathbf{A}_m\|_F^2 = \sum_{i=1}^m \sigma_i^2(\mathbf{A}) \leq \frac{1}{2} \sum_{i=1}^p \sigma_i^2(\mathbf{A}) = \frac{1}{2} \|\mathbf{A}\|_F^2 = \frac{1}{2} (\|\mathbf{A}_m\|_F^2 + \|\mathbf{A} - \mathbf{A}_m\|_F^2) \Rightarrow 2\|\mathbf{A}_m\|_F^2 \leq \|\mathbf{A}_m\|_F^2 + \|\mathbf{A} - \mathbf{A}_m\|_F^2 \Rightarrow \|\mathbf{A}_m\|_F^2 \leq \|\mathbf{A} - \mathbf{A}_m\|_F^2 \Rightarrow \|\mathbf{A}\|_F \leq \sqrt{2}\|\mathbf{A} - \mathbf{A}_m\|_F$ . Now invoking Lemma ?? ensures that,  $\|\mathbf{A} - \tilde{\mathbf{A}}_m\|_F \leq (1 + 3\sqrt{2\epsilon_2}(k/\epsilon_3)^{1/4})\|\mathbf{A} - \mathbf{A}_m\|_F$ . Setting  $\epsilon_2 = \frac{1}{18} \sqrt{\frac{\epsilon_3^9}{k}}$  yields the desired result.  $\square$

## 1.4. Proof of Corollary 1

*Proof.* Since  $\gamma = 1 + \epsilon_1$ , it is easy to see that  $\frac{\gamma_1(1+11\epsilon)}{(1+\epsilon_1+4\epsilon)(1+11\epsilon)} = \frac{(\gamma+4\epsilon)(1+11\epsilon)}{1-4\epsilon} \leq \frac{\gamma(1+4\epsilon)(1+11\epsilon)}{1-4\epsilon} \leq \frac{\gamma(1+15\epsilon+44\epsilon^2)}{1-4\epsilon} \leq \frac{\gamma(1+59\epsilon)}{1-4\epsilon}$ . We require  $\frac{(1+59\epsilon)}{1-4\epsilon} \leq 1 + \epsilon' \Rightarrow (1+59\epsilon) \leq (1-4\epsilon + \epsilon'(1-4\epsilon)) \Rightarrow 63\epsilon \leq (\epsilon' - 4\epsilon\epsilon') \Rightarrow \epsilon \leq \frac{\epsilon'}{63+4\epsilon'}$ . Setting  $\epsilon = \epsilon'/67$  and plugging in Theorem ?? yields the desired result.  $\square$

## References

Achlioptas, D. and Mcsherry, F. Fast computation of low-rank matrix approximations. *J. ACM*, 54(2), April 2007. ISSN 0004-5411. doi: 10.1145/1219092.1219097. URL <http://doi.acm.org/10.1145/1219092.1219097>.
